# Supplementary material
Source: PubMed Central journal article supplement (PMC2966092)
Supplement: supp_M110.145367_jbc.M110.145367-1.pdf [file supp_M110.145367_jbc.M110.145367-1.pdf]

**Supplemental Table 1. Primer information**

| Plasmids               | Primers       | Sequence                                                |
|------------------------|---------------|---------------------------------------------------------|
| pGEM-SILLP             | LLP-S-F       | 5'-TCCATGTAAGCTCTCAATATTGTTT-3'                         |
|                        | LLP-S-R       | 5'-TTTTCTGGTACCAATGAGCTAACA-3'                          |
| pThio-SILLP            | LLP-F         | 5'-GGGCTCGAGATGGAATCACAACGGGTTT-3'                      |
|                        | LLP-R         | 5'-CCC GCGGCCGCTTAGTGGTGGTGGTGGTGGGAGGTACTTGCACCCATT-3' |
| pThio-SILLP-C295A      | LLPSDM1-F     | 5'-TGGGTCGTAATGCCCGTTTTTAAG-3'                          |
|                        | LLPSDM1-R     | 5'-CTTAAAAACCGGCATTACGACCCA-3'                          |
| pThio-SILLP-R67D       | LLPSDM2-F     | 5'-AGGGAAGAATGGAGATGTATTTCAAGGGC-3'                     |
|                        | LLPSDM2-R     | 5'-GCCCTTGAAATACCCTCCATTCTCCCT-3'                       |
| pThio-SILLP-R296D      | LLPSDM3-F     | 5'-GGGTCGTAATTGCGACTTTTTAAGTGGGGA-3'                    |
|                        | LLPSDM3-R     | 5'-TCCCCACTTAAAAACCGGCAATTACGACCC-3'                    |
| pThio-SILLP-G66C/R296D | LLPSDM4-F     | 5'-GTTTTAGGGAAGAATTGCAGGGTATTTCAAGG-3'                  |
|                        | LLPSDM4-R     | 5'-CCTTGAAATACCCTGCAATTCTCCCTAAAAAC-3'                  |
| pGEX-PpLLP1            | PpLLP1-F      | 5'-AAGAATTCATGTTTCTTAGCGGTGGCG-3'                       |
|                        | PpLLP1-R      | 5'-TTCTCGAGTCACTCTTGGGCCTGCGT-3'                        |
| pGEX-PpLLP2            | PpLLP2-F      | 5'-AAGAATTCATGTCTGTGGGAGATAGTGT-3'                      |
|                        | PpLLP2-R      | 5'-TTCTCGAGTCAAGCTTTCGGTATCCGTC-3'                      |
| pGEX-PpLLP1-LOV1       | PpLLP1-LOV1-F | 5'-AAAGAATTCAACTTTGTGTTAAGCGACCC-3'                     |
|                        | PpLLP1-LOV1-R | 5'-AAACTCGAGTTAGTCATCAGCAATGGGCGTC-3'                   |
| pGEX-PpLLP1-LOV2       | PpLLP1-LOV2-F | 5'-AAAGAATTCAGTCTTATCCTATCTGATCC-3'                     |
|                        | PpLLP1-LOV2-R | 5'-AAACTCGAGTTAAGCTTCACTGACGTTTCAGC-3'                  |
| pGEX-PpLLP2-LOV1       | PpLLP2-LOV1-F | 5'-AAAGAATTCAACTTCGTGTTGAGCGACCC-3'                     |
|                        | PpLLP2-LOV1-R | 5'-AAACTCGAGTTAGTCCTTAGCAATGGGTGTCT-3'                  |
| pGEX-PpLLP2-LOV2       | PpLLP2-LOV2-F | 5'-AAAGAATTCAGTCTTGTCCTAGCTGATCC-3'                     |
|                        | PpLLP2-LOV2-R | 5'-AAACTCGAGTTAGGCGATGCTGACATCCAGC-3'                   |

**Supplemental Table 2.** Molar ratios of FMN to each of the *S*/LLP proteins

|               | Protein    | FMN/Protein<br>(measured) <sup>a</sup> | FMN/Protein<br>(expected) <sup>b</sup> | Measured/expected<br>Ratio <sup>c</sup> |
|---------------|------------|----------------------------------------|----------------------------------------|-----------------------------------------|
| <i>S</i> /LLP | WT         | 0.37                                   | 2                                      | 0.19                                    |
|               | C295A      | 0.36                                   | 2                                      | 0.18                                    |
|               | R67D       | 0.20                                   | 1                                      | 0.20                                    |
|               | R296D      | 0.13                                   | 1                                      | 0.13                                    |
|               | R67D/R296D | not detected                           | 0                                      | not calculated                          |
|               | G66C/R296D | 0.12                                   | 1                                      | 0.12                                    |

<sup>a</sup> Results are average values of two preparations (WT and R296D) and values of one preparation (C295A, R67D, R67D/R296D and G66C/R296D).

<sup>b</sup> Expected FMN/Protein ratio is the value expected from the number of LOV domain having the potential FMN binding in each protein.

<sup>c</sup> Measured FMN/Protein ratio is divided by expected FMN/Protein ratio.

**Supplemental Table 3.** Molar ratios of FMN to each of the *Pp*LLP1 and *Pp*LLP2 proteins

|                | Protein     | FMN/Protein<br>(measured) <sup>a</sup> | FMN/Protein<br>(expected) <sup>b</sup> | Measured/expected<br>Ratio <sup>c</sup> |
|----------------|-------------|----------------------------------------|----------------------------------------|-----------------------------------------|
| <i>Pp</i> LLP1 | Full-length | 0.37                                   | 2                                      | 0.19                                    |
|                | LOV1        | 0.07                                   | 1                                      | 0.07                                    |
|                | LOV2        | 0.15                                   | 1                                      | 0.15                                    |
| <i>Pp</i> LLP2 | Full-length | 0.38                                   | 2                                      | 0.19                                    |
|                | LOV1        | 0.21                                   | 1                                      | 0.21                                    |
|                | LOV2        | 0.23                                   | 1                                      | 0.23                                    |

<sup>a</sup> Results are average values of two preparations (*Pp*LLP1 Full-length; *Pp*LLP2 Full-length, LOV1 and LOV2) and values of one preparation (*Pp*LLP1 LOV1 and LOV2).

<sup>b</sup> Expected FMN/Protein ratio is the value expected from the number of LOV domain having the potential FMN binding in each protein.

<sup>c</sup> Measured FMN/Protein ratio is divided by expected FMN/Protein ratio.

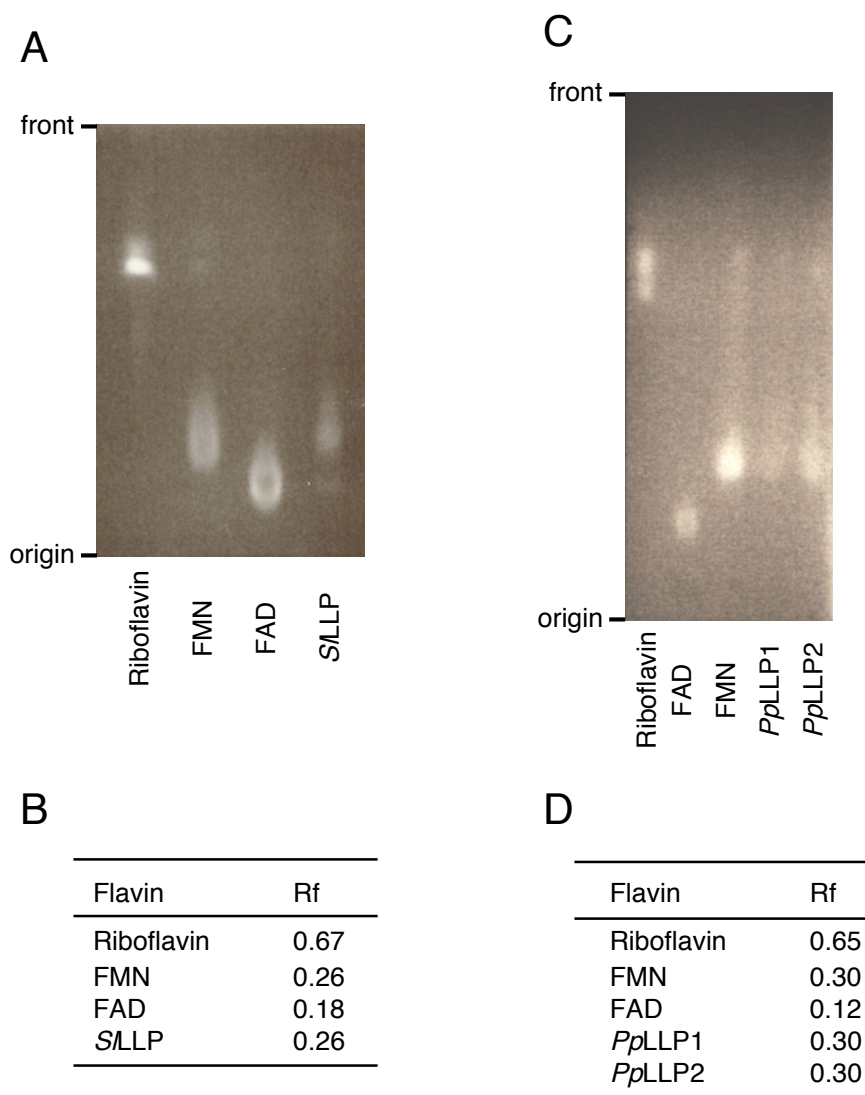

**FIGURE S1. Identification of the chromophore associated with LLPs.** (A) Thin-layer chromatogram of the chromophore associated with *S*LLP and flavin standards, riboflavin, FMN and FAD. (B) Rf values calculated from the chromatogram shown in A. (C) Thin-layer chromatogram of the chromophore associated with *Pp*LLP1, *Pp*LLP2 and flavin standards, riboflavin, FMN and FAD. (D) Rf values calculated from the chromatogram shown in C.

```

SILLP 1 H E - - - - - S Q L G L T E K - - - - - S F N V K Y S D G V R E A L D E L P D S F T I T D P S I S G H P I V
AtLLP 1 H S L T - - - - - K S E S V F R A E E E - - - - - D S F S G R M T L H T R E A L D E L P H S F E L T D P F T S G H P T V
OsLLP 1 H E G A - - - - - E A E R R L R A - - - - - S L T A R M S D W V E A L D E L P G S F E L T D P R A M P G H P E V
VvLLP 1 H E - - - - - S Q L A L L E K - - - - - S F N Y R Y S V W V R E A L D E L P D H F T I T D P S I S G H P T V
PtLLP 1 H E - - - - - S Q L A L L E K - - - - - S F N T R Y S P W V R E A L D E L P H F T I T D P T I S G H P T V
SmLLP 1 H A L - - - - - Q N G S L L - - - - - S S D R K C V R S P R M K N H K L I V S S L I R S Y R A S I Q D E L Q K H A Y N F V L C D P G L P D H P T V
PpLLP1 1 H F L S G G G G A A V M E A A G E K L R M G E G S G G R S G S F G K R R S P K L E D L V D S L S R A V N E K V G Q A L G Q H E Y N F V L S D P R L P D H P T V
PpLLP2 1 H - - S V G D S V A A V M D S E G D M L K L G G R N G D R T C S F G K R R A V K L E E L V D S L S R A V N E K T G Q V L Q Q H E Y N F V L S D P R L P D H P T V

```

```

SILLP 45 Y V S R G F L K V F G Y S K N E V I G K N G R V F O G G P K T N R R S V M A T R E A T R E E R G I O I S L L N Y R K D G T P F W H L F N M C P V Y S E K D G R V V
AtLLP 53 F A S L G E L K M T G Y S R E E V F G R N N G R V F O G G P K T N R R S T M E I R E A T R E E R S V Q V S L L N Y R S G S P E F W L E H M C P V F K D D G K V T
OsLLP 48 Y A S R G L A S L T G Y P P R E V I G R N A R F O G G A D T D R A A A G V F E A V R G D R P H O V S L L N Y R R D G E A F W L L H L A P V F H A S D G R V L
VvLLP 45 F A S R G F L K N S G Y S K E E V I G K N G R A F O G G P T S R R S T T E I Q E A I Q E E R T I O T I L L N Y R K D G T P I W M L F H M S P V F S K E D G R V I
PtLLP 45 F A S P G F L K N S G F R R D D V I G N N G R M F O G G P K T N R K R A I V M E I R E A T R E E R A V Q V S L W N Y R K D G T P F W L F O M S P V F S K E D G R V I
SmLLP 65 F A S D G F L E M T G Y R D E V I G R N C R F L O G R D T D R R R A I V M E I R E A T R E E R A C Q V L I L N Y T R A G K P F W N L F H A P V F S Q D G R V I
PpLLP1 81 F A S E G F L R M S R Y R D E V I G R N C R F L O G P D T D R R I V M E I R D A T R E E R A C Q V L I L N Y T R Y K E P F W N L F H M A P I F S S - D G Q V T
PpLLP2 79 F A S E G F L R M S G Y D R E E V I G R N C R F L O G P D T D R G T V M E I R D A T R E E R A C Q V R I L N Y T R Q G E P F W N L F H M A P I F S N - D G R V T

```

LOV1

```

SILLP 125 H F L G I Q V P I L R R - - R N S L G G G I G R N G G V C Y D G G N C R G Y V Y K C R R E V C S N S M M E M D A L S V D S V S G L D H T E V D V E G - - - -
AtLLP 133 H F L A V Q V P I S G R - - E H R R K K - L R N V G D L S D T S P - - - - T F G S C R R E V C F G N F V C Q D A L P V E - - C D D D E Q G L E D W E - - - -
OsLLP 128 H F L A V Q V P I A P P - - A S R R T P P C R A A - - - - - R P F V F V A A C R E E A R V E E - E C P C A S H A G E V F V D V D K R G Q D A E E - - - -
VvLLP 125 H F L A V Q V P I S R K - - P R W S G S G P G R D G - V E D G C R S R D I V F G S C R R E V C S D S V L E L E H V L A F E S L - - F D S D N R D D E - - - -
PtLLP 125 H F T G V Q V P I L R N - - K R S T D D G A D A A - - - - - W N E I V F G S C R R E V C S D S L V E L G T V L A L D T Y - - T N C R G V T E E - - - -
SmLLP 145 H F V G V Q V P I S - - - - - S K V A A R K D G H L T G L E - - - - L S F D E L E F E - - - - - H F H D N P S C K N Y H L S E D - - - -
PpLLP1 160 H F V G V Q V P I S A D D L A S Q A L L S E L P A M N D S F L S A K E Y T D V A R L D S C E S T H D N L S K S S R G R D V E - - - - - D E D S L
PpLLP2 158 H F V G V Q V P I A K D L L S E A V T A A L P A E D G S S V P A E E S A A D L R G D S L H S P D E S S V N M R L G G E T E P M V D R E T A T S H A D E D E A

```

```

SILLP 199 P C E A S D Q E K T K A S V A V N I H S V I A N Y S E L N G R V I D R R C C Q S G T - - - S L L S A S L N I S F G R I K Q S F V L T D A H L P D M P I V Y
AtLLP 200 - - - - - C E A S E S E K L K A T E A T N N V L S I L V H Y S E L S G R V C G K R Y C L R G V - - - D C L S S S L N I S L G R I K Q S F V L T N P C L P D M P I T Y
OsLLP 193 P R V A S D E H E K E A L S T A N S I F S A I N R R Y S K L T G L V C G K R C D S V G I - - - P A I S S S L N I S L G R I K Q S F V L T D P H L P D M P I Y
VvLLP 196 P R E A S D Q E K R R A A A V N I L S V L T H Y S E L T G R V C E K R C T L S G I - - - G L L G A S L I T S L G R I K Q S F V L T D P H L P E M P I V Y
PtLLP 188 P W E A S D L E K Q R A A T T M T I L S V L T H Y S E S T G R L A C G K R C S S P A A - - - G L T N S S L N I S L G R N Q S F V L T D P H L P M H P T V
SmLLP 196 - - - - - K Q R F A A R A V L O E A N S - - C K G V S M R S K S F S E G V I P P G F V A T S L L L A L T R I P H S E V L T D P H L P D M P I V H
PpLLP1 227 H P - - V N E G V N Q K A T L A V E K V T S E L T Q L S R V K G A L E K N R V G L S E S A A K G V V S S L L S L T R I Q S L I S D P H L P D T P I V H
PpLLP2 238 H P S F V N D D V K E K A A V A V Q T V T G E I T R S R V K G A L E Q N R I T G L S E C A A K G V V S S L L S L T R I Q S L I S D P H L P D T P I V H

```

```

SILLP 275 A S D A F E L I G Y L N H E V L G R N C R F L S G E D T E R G T Q F Q L K Q C Q N E Q P C T V H L L N Y R K D G T S F W N F L H I S P I R S A S G K V A Y F
AtLLP 276 A S D A F E L I T G Y R R Q E I V L G N C R F L S G V D T D S S V L Y E M K Q C H L K G O S C T V H L L N Y R K D K S S F W N L L H I S P V R N A S G K T A Y F
OsLLP 269 A S D A F E L I T G Y R R E I L L C N C R F L N G P G T S V E V L E Q T N O H C S E O A C T V H L L N Y R K D G S S F R D L L H I S P R N A S G K V A Y F
VvLLP 272 A S D A F E L I T G Y R N H E V L G C G M F L S G V D D P S T L L Q V M H O T E O A C T V R L L N Y R K D R S S F W N L L H I S P R N A S G K T A Y S
PtLLP 264 A S D A F E L I T G Y R N H E V L G C N H R F L S G V G D D S V L L Q T E S H Q V E Q A C T V C E L N Y R K D K S T F W N L L H I S P V R N A S G K T A Y F
SmLLP 266 A S L E F L I T G Y R E E V T G R N C R F L Q G P D T D L A P I E L R S S E G O T C T I R L L N Y R K N K E P F W N S L H I S P V R N S G K V A Y V
PpLLP1 305 A S D V F C E L T G Y S R E E V V G R N C R F L Q G P D T D P E A V R E T R E A T K A E R P Y T V R L L N Y K K O N T P F W N L H V A P V R S A T G V A Y F
PpLLP2 318 A S D V F C E L T G Y S R E E V V G R N C R F L Q G P D T D P E S V R E T R E A T Q A E R P C T V R L L N Y R K D D T P F W N L H V A P V R S A T G K V A Y F

```

LOV2

```

SILLP 355 V G I O I E D T T E A R - - - E K O L N P E M R H R S V V A A V K V A V R G W S H G A S T S
AtLLP 356 V G V Q V E A S C R N T - - - E I K E L R P E T R O L S V Y G A V R V A V R S S L M V T C
OsLLP 349 W V W H L E D E G A K Y - - - D F N G L T P E W W O L G A V G A V R V A V R S S A S G S L L R P S Q
VvLLP 352 W V Q M E E G C G Y Q - - - D A O G L S P E N R Q R S T V G A V K V A V R S S M G A G P S K S
PtLLP 344 V G V Q M E E K C K S Q - - - D R H G L S P E T R O L S A V G A V K V A V R S S M G A G C S K S S D R F N T L
SmLLP 346 A G T Q V A V S H S S - - - E E D E G R A R M Q L G T L G A I K V A V R S I - Q T G P V L R K S K T I S
PpLLP1 385 V G V Q L N V S E A D V P V V Q G A S L R A D A K O L S A V G V V R V A V R S L - Q G S G L R R R P K E
PpLLP2 398 V G V Q L D V S I A D L P M - R G D S L R A D A K O L S A V G V V R V A V R S L - Q G C G L R R I P K A

```

**FIGURE S2. Amino acid alignment of LLPs.** Alignment of the amino acid sequences of LLPs of *Solunum lycopersicum* (SILLP), *Arabidopsis thaliana* (AtLLP), *Oryza sativa* (OsLLP), *Vitis vinifera* (VvLLP), *Populus trichocarpa* (PtLLP), *Selaginella moellendorffii* (SmLLP) and *Physcomitrella patens* (PpLLP1 and PpLLP2). Amino acid residues identical in more than five sequences are shaded. Gaps introduced for good alignment are indicated by dashes. Numbers are amino acid positions for each amino acid sequence. Single lines indicate LOV1 and LOV2 domains. The highly conserved cysteines in the LOV2 domains are indicated by the solid arrowhead. The corresponding amino acids in the LOV1 domains are indicated by the open arrowhead. A highly conserved C-terminal region is indicated by a double line.

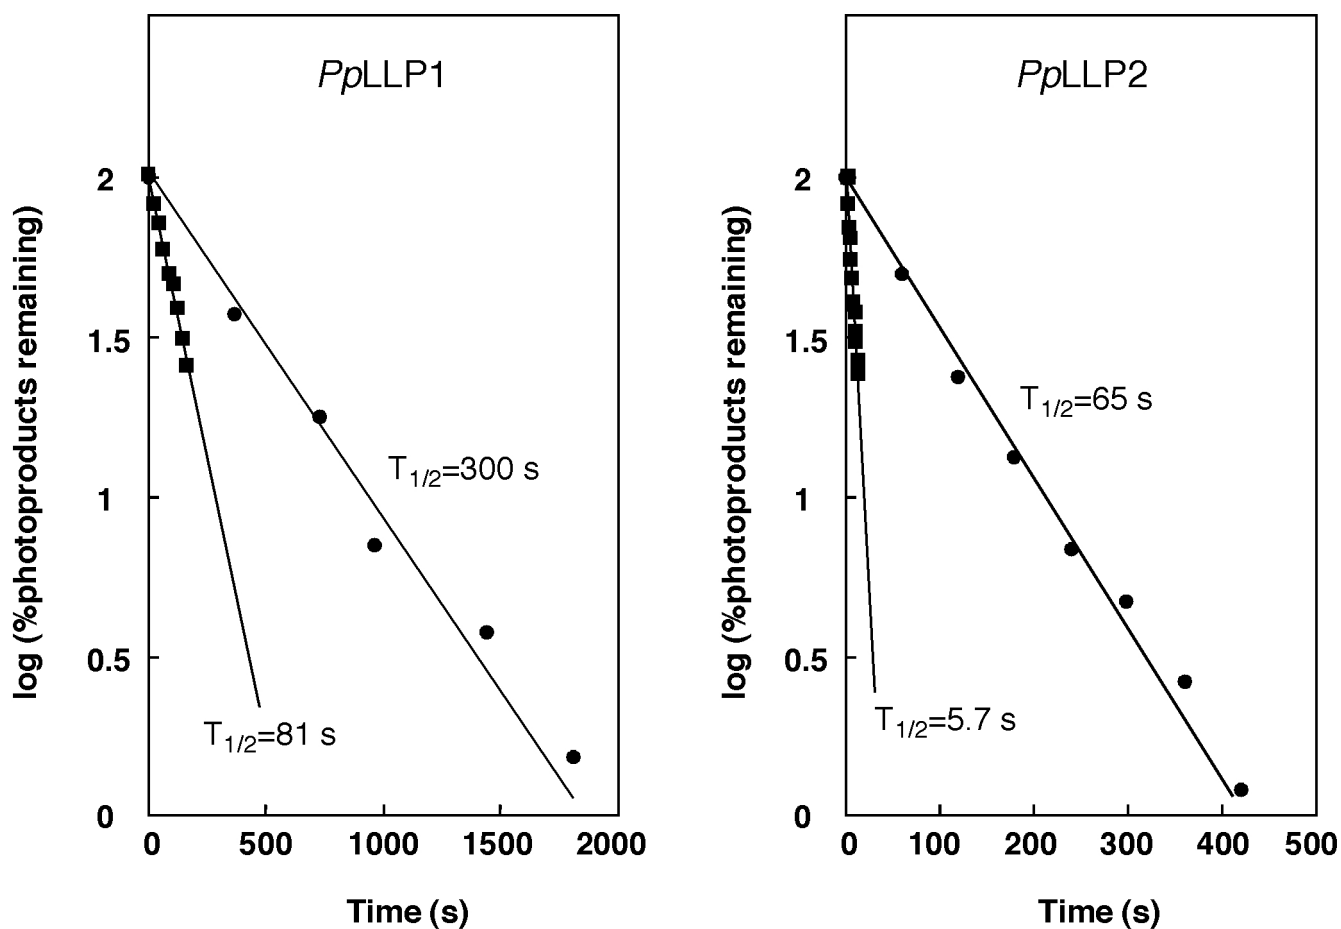

**FIGURE S3. Effect of imidazole on dark reversion kinetics of *PpLLP1* (left) and *PpLLP2* (right).** The amount of photoproduct remaining after dark incubation is plotted against the duration of dark incubation in the presence (square) or the absence (circle) of 100 mM imidazole. Half lives ( $T_{1/2}$ ) are shown.
